# Supplementary material
Source: publisher site journal article supplement (https://www.kjim.org/upload/media/kjim-2022-183-Supplementary-Fig-3.pdf)
Supplement: Supplementary file 1 [file kjim-2022-183-Supplementary-Fig-3.pdf]

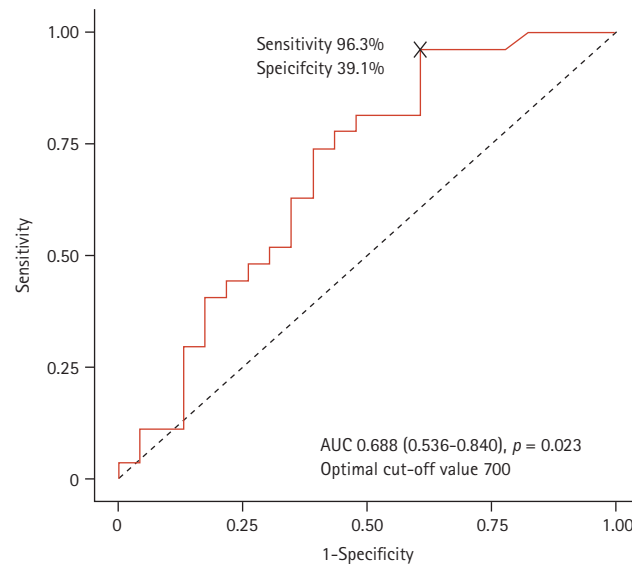

**Supplementary Figure 3.** Receiver operating characteristic (ROC) analysis to determine the optimal value of absolute lymphocyte counts at the day prior to the third cycle of daratumumab ( $ALC^{D56}$ ) based on the treatment response. The area under the curve (AUC) is 0.668 and the cut-off value is 700.
